# Supplementary material
Source: ML conference proceedings conference paper supplement (https://openreview.net/forum?id=x9XepNPGJ5)
Supplement: supplementary_material [file Technical Appendices.pdf › Supplementary Material/Technical Appendices.pdf]

828 **Appendix**

|     |                                  |    |
|-----|----------------------------------|----|
| 829 | <b>Appendix Contents</b>         |    |
| 830 | <b>A Proofs and Derivations</b>  | 21 |
| 831 | A.1 Proof of Proposition 1       | 21 |
| 832 | A.2 Derivation in Section 4.2    | 21 |
| 833 | A.2.1 Recursion for $y^l$        |    |
| 834 | A.2.2 Universal Approximation    |    |
| 835 | A.2.3 Quadratic Activation       |    |
| 836 | A.3 Derivation in Section 4.3    | 23 |
| 837 | <b>B Implementation Details</b>  | 24 |
| 838 | B.1 Featureless Models           | 24 |
| 839 | B.2 Feature-based Models         | 24 |
| 840 | <b>C Empirical Study Details</b> | 25 |
| 841 | C.1 Featureless Experiments      | 25 |
| 842 | C.1.1 Synthetic Data Experiments |    |
| 843 | C.1.2 Real Dataset Experiments   |    |
| 844 | C.2 Feature-based Experiments    | 26 |
| 845 | C.2.1 Datasets Details           |    |
| 846 | C.2.2 Experiments Details        |    |

## 847 A Proofs and Derivations

### 848 A.1 Proof of Proposition 1

849 *Proof.* Consider the following form of  $v$ :

$$v_j(X_{T \cup \{j\}}) := \sum_{R \subset T} (-1)^{|T| - |R|} u_j(x_j, X_R). \quad (12)$$

850 Thanks to the permutation equivariance of  $u_j$ , the function  $v_j$  given by (3) is permutation equivariant.  
851 Indeed, for every permutation  $\pi$  on  $T \cup \{j\}$ , it holds that

$$\begin{aligned} v_j(X_{\pi(T \cup \{j\})}) &= \sum_{Q \subset \pi(T)} (-1)^{|\pi(T)| - |Q|} u_j(X_{Q \cup \pi(j)}) \\ &= \sum_{R \subset T} (-1)^{|T| - |R|} u_{\pi(j)}(X_{R \cup \{j\}}) \\ &= v_{\pi(j)}(X_{T \cup \{j\}}), \end{aligned}$$

852 where the second equality follows from the change of variable  $R = \pi^{-1}(Q)$ .

853 Next, let us verify that the function  $v$  given in (3) can express the utility function  $u_j(X_S)$ . Indeed,  
854 for every  $S$  and  $j = 1, \dots, |S|$ , using (3) we write  $\sum_{T \subset S \setminus \{j\}} v(x_j, X_T)$  as

$$\sum_{T \subset S \setminus \{j\}} \sum_{R \subset T} (-1)^{|T| - |R|} u(x_j, X_R).$$

855 By switching the order of summation, this equals

$$\sum_{R \subset S \setminus \{j\}} u(x_j, X_R) \sum_{T \supset R, T \subset S \setminus \{j\}} (-1)^{|T| - |R|}.$$

856 When  $R = S \setminus \{j\}$ , the inner sum is 1. Otherwise, the inner sum equals

$$\sum_{k=0}^{|S| - 1 - |R|} (-1)^k \binom{|S| - 1 - |R|}{k} = 0^{|S| - 1 - |R|} = 0.$$

857 This shows that

$$\sum_{T \subset S \setminus \{j\}} v(x_j, X_T) = u_j(X_S),$$

858 which completes the proof.

859 □

### 860 A.2 Derivation in Section 4.2

#### 861 A.2.1 Recursion for $y^l$

862 Let us first write  $y^l = \sum_{j=1}^J z_j^l$  with  $y^0 = e_S$  where  $z^l$  is defined in (9). Since  $y^0 = e_S =$   
863  $\sum_{j=1}^J e_j = \sum_{j=1}^J z_j^0$ , it implies  $\chi(x) = x$  being an identity mapping such that  $z_j^0 = e_j$ . Recall

$$\Theta^l = \frac{1}{HS} \sum_{h=1}^H (q_{h,\cdot}^l)^\top W_{h,\cdot}^l, \quad \Theta_{jk}^l = \frac{1}{HS} \sum_{h=1}^H q_{hj}^l W_{hk}^l.$$

864 We write

$$z_j^1 = e_j + \frac{1}{HS} \sum_{h=1}^H \left( \sum_{k \in S} W_{hk}^1 \right) \cdot q_{hj}^1 e_j = e_j + \sum_{k \in S} \Theta_{jk}^1 e_j.$$

865 It follows that

$$y^1 = \sum_{j=1}^J e_j + \sum_{j=1}^J \sum_{k \in S} \Theta_{jk}^1 e_j = \sum_{j=1}^J e_j + \sum_{j=1}^J \sum_{k \in S} \Theta_{jk}^1 e_k e_j = y^0 + \Theta^1 (e_S \odot e_S) = y^0 + \Theta^1 (y^0 \odot e_S).$$

866 For  $l = 2, \dots, L$ ,

$$\begin{aligned}
y^l &= \sum_{j=1}^J z_j^{l-1} + \sum_{j=1}^J \frac{1}{HS} \sum_{h=1}^H \left( \sum_{k \in S} W_{h,k}^l z_k^{l-1} \right) \cdot q_{hj}^l e_j \\
&= y^{l-1} + \sum_{j=1}^J \frac{1}{HS} \sum_{h=1}^H \sum_{k=1}^J W_{h,k}^l q_{hj}^l y_k^{l-1} e_j \\
&= y^{l-1} + \sum_{j=1}^J \sum_{k=1}^J \Theta_{jk}^l y_k^{l-1} e_j \\
&= y^{l-1} + \Theta^l(y^{l-1} \odot e_S)
\end{aligned}$$

867 as desired.

### 868 A.2.2 Universal approximation

869 We consider a flexible model by setting  $y^l \in \mathbb{R}^{J'}$  with  $J' > J$ . Let  $\Theta^1 \in \mathbb{R}^{J' \times J}$ ,  $\Theta^l \in \mathbb{R}^{J' \times J'}$  for  
870  $l = 2, \dots, L$  and  $W^l \in \mathbb{R}^{J \times J'}$ .

$$\begin{cases} y^1 = \Theta^1 e_S, \\ y^l = y^{l-1} + \Theta^l(y^{l-1} \odot y^1), \quad l = 2, \dots, L. \end{cases}$$

871 We show inductively that there exists  $W^l \in \mathbb{R}^{J \times J'}$  such that  $W^l y^l$  can represent any up to  $l$ -th order  
872 interactions.

873 We first consider the base case  $l = 1$ . By definition of  $y^1$ ,

$$y_j^1 = \sum_{k=1}^J \Theta_{jk}^1 \mathbb{I}(k \in S).$$

874 For  $j \in S$ , we can further write

$$\begin{aligned}
y_j^1 &= \Theta_{jj}^1 \mathbb{I}(j \in S) + \sum_{k=1: k \neq j}^J \Theta_{jk}^1 \mathbb{I}(k \in S) \\
&= v_j^1(\emptyset) \mathbb{I}(j \in S) + \sum_{k=1: k \neq j}^J v_j^1(\{k\}) \mathbb{I}(k \in S),
\end{aligned}$$

875 where  $v_j^1(\emptyset) =: \Theta_{jj}^1$ ,  $v_j^1(\{k\}) := \Theta_{jk}^1$ . For  $j > J$ , it can be set to any function value parameterized  
876 by  $\Theta_{j,\cdot}^1, e_S$  provided that  $S$  is not empty, which is independent of other  $y_j^{l-1}$ 's with  $j \leq J$ . Without  
877 loss of generality, we can simply set  $W^1 = [I_J; 0] \in \mathbb{R}^{J \times J'}$  to output  $W^1 y^1 = \{y_j^1\}_{j \in S}$ , which  
878 represent any first-order interaction model.

879 Now suppose  $W^{l-1} y_j^{l-1}$  can represent any interaction model up to  $(l-1)$ -th order with  $W^{l-1} =$   
880  $[I_J; 0] \in \mathbb{R}^{J \times J'}$ , which means for any  $j = 1, \dots, J$ ,

$$y_j^{l-1} = \sum_{T \subseteq \{1, \dots, J\}, |T| \leq l-1} v_j^{l-1}(T) \prod_{k \in T} \mathbb{I}(k \in S).$$

881 and for any  $j > J$ ,  $y_j^{l-1}$  can be set to any function value independent of other  $y_j^{l-1}$ 's with  $j \leq J$ .

882 For  $j = 1, \dots, J'$ ,

$$\begin{aligned}
y_j^l &= y_j^{l-1} + \sum_{j'=1}^{J'} \Theta_{jj'}^l y_{j'}^{l-1} \sum_{k=1}^J \Theta_{j'k}^1 \mathbb{I}(k \in S) \\
&= y_j^{l-1} + \sum_{j'=1}^{J'} \Theta_{jj'}^l \sum_{T \subseteq \{1, \dots, J\}, |T| \leq l-1} v_{j'}^{l-1}(T) \prod_{k \in T} \mathbb{I}(k \in S) \sum_{k'=1}^J \Theta_{j'k'}^1 \mathbb{I}(k' \in S) \\
&= y_j^{l-1} + \sum_{|T| \subseteq \{1, \dots, J\}, k' \in \{1, \dots, J\}, |T \cup \{k\}| = l} \sum_{j'=1}^{J'} \Theta_{jj'}^l \Theta_{j'k'}^1 v_{j'}^{l-1}(T) \prod_{k \in T \cup \{k'\}} \mathbb{I}(k' \in S),
\end{aligned}$$

where  $\bar{y}_j^{l-1}$  is another function that can capture any up to  $l-1$ -th order interaction by combining original  $y_j^{l-1}$  with the terms in the summation where  $k \in T$ . Since  $\Theta_{jj'}^l$  is independent of  $v_j^{l-1}(T)$ , we can identify  $\hat{v}_j^l(T \cup \{k\}) = \sum_{j'=1}^{J'} \Theta_{jj'}^l \Theta_{j'k}^1 v_j^{l-1}(T)$  for any  $T \cup \{k\} = l$ , which use  $J'$  basis to approximate any  $l$ -th order interaction. Thus

$$y_j^l = \bar{y}_j^{l-1} + \sum_{T \subseteq \{1, \dots, J\}, |T|=l} \hat{v}_j^l(T) \prod_{k \in T} \mathbb{I}(k \in S).$$

With  $W^l = [I_J; 0] \in \mathbb{R}^{J \times J'}$ ,  $W^l y^l = [y_j^l]_{j \in S}$  approximate any up to  $l$ -th order interactions. By induction,  $y_j^L$  can capture up to  $L$ -th order interaction with sufficiently large  $J'$ , where  $W^L$  can be set to  $[I_J; 0] \in \mathbb{R}^{J \times J'}$  without loss of generality.

### A.2.3 Quadratic activation

Here we explain why the formulation (10) needs at most  $\lceil 1 + \log_2(J-1) \rceil$  layers to capture all orders of interactions of the  $J$  alternatives.

Starting  $l = 1$ , given  $y^0 = e_S$ ,

$$y^1 = e_S + \Theta^1(e_S \odot e_S) = e_S + \Theta^1 e_S,$$

thus

$$y_j^1 = \mathbb{I}(j \in S) + \sum_{k=1}^J \Theta_{jk}^1 \mathbb{I}(k \in S) =: v_j^1(\emptyset) \mathbb{I}(j \in S) + \sum_{k=1: k \neq j}^J v_j^1(\{k\}) \mathbb{I}(k \in S),$$

which contains up to first-order interaction.

Now consider  $l = 2, \dots, L$ . Assume  $y^{l-1}$  contains up to  $p$ -th order interaction such that

$$\begin{aligned} y_j^{l-1} := & v_j^{l-1}(\emptyset) \mathbb{I}(j \in S) + \sum_{\{j_1\} \subseteq S \setminus \{j\}} v_j^{l-1}(\{j_1\}) \mathbb{I}(j_1 \in S) + \dots \\ & + \sum_{\{j_1, \dots, j_p\} \subseteq S \setminus \{j\}} v_j^{l-1}(\{j_1, \dots, j_p\}) \prod_{i=1}^p \mathbb{I}(j_i \in S). \end{aligned}$$

Then the term

$$y_j^l = y_j^{l-1} + \sum_{k=1}^J \Theta_{jk}^l (y_j^{l-1})^2.$$

can contain a high-order term for  $j'_1 \neq \dots \neq j'_p \neq j'_1 \neq \dots \neq j'_p$ ,

$$\sum_{k=1}^J \Theta_{jk}^l v_j(\{j_1, \dots, j_p\}) v_j(\{j'_1, \dots, j'_p\}) \prod_{i=1}^p (\mathbb{I}(j_i \in S) \mathbb{I}(j'_i \in S)),$$

which is a  $2p$ -th order interaction. By induction, with  $L$  recursion, the model contains up to  $2^{L-1}$ -th order interactions. Therefore, to represent the full order interaction for  $J$  products with up to  $J-1$ -th order interaction, we need at most  $\lceil 1 + \log_2(J-1) \rceil$  recursions.

### A.3 Derivation in Section 4.3

In this section, we derive the identifiability property for the parameter  $\alpha$  as defined in (11). Recall  $\mathcal{S}$  denotes the full set of products. Suppose for a fixed product pair  $\{i, j\} \subseteq \mathcal{S}$ , the dataset contains observed market shares for all choice sets in the collection

$$E = \{\{i, j\} \cup B : B \subseteq \mathcal{S} \setminus \{i, j\}\}.$$

We claim that the system of equations defined by (1) is square and full-rank such that the relative halo effect parameters  $\{\alpha_{jk}(T)\}_{B \subseteq \mathcal{S} \setminus \{i, j\}}$  are uniquely identifiable from the observed data.

To prove this claim, we need to prove that the number of new variables, denoted as  $N_\alpha$ , is the same as the number of equations associated with them (from the choice probability of each choice set), denoted as  $N_{ep}$ , and

$$N_{ep} = \sum_{q=2}^n \binom{n}{q} \times (q-1). \quad (13)$$

Note that the summation  $\sum_{q=2}^n \binom{n}{q} = \sum_{q=2}^n \binom{n}{n-q}$  is the number of subset of all items whose size is smaller than  $n-2$ . These sets can be the source set  $T$  of halo effect difference  $\alpha$ , since there is at least one pair of items out of these sets. Suppose the number of items in the subsets is  $q$ . We only need  $q-1$  halo effect differences to calculate all pair-wise differences within  $q$  items. Therefore,

$$N_\alpha = N_{ep} = \sum_{q=2}^n \binom{n}{q} \times (q-1). \quad (14)$$

Furthermore, prior work such as Batsell and Polking [1985a] and Park and Hahn [1998b] has shown that the corresponding coefficient matrix is full-rank, as the system represents a saturated model. This guarantees the linear independence of equations, and hence, the parameters  $\alpha$  are identifiable.

## B Implementation Details

### B.1 Featureless Models

**Model Width** In our formulation (Equation 9 and Equation 10), we initially constrain the model width to match the size of the item universe  $J$ , setting the shape of  $\Theta^l$  to  $\mathbb{R}^{J \times J}$ . This aligns our model with prior work, such as the low-rank Halo MNL model [Ko and Li, 2024] and contextual MNL [Yousefi Maragheh et al., 2020a].

While a width of  $J$  suffices to capture zeroth- and first-order Halo effects, it is inefficient for higher-order interactions. As the number of possible interactions grows exponentially with order, deeper layers must activate and compose increasingly complex patterns from lower-order terms. However, under a fixed width, scaling model capacity necessitates increasing depth, which complicates optimization and training stability.

To alleviate this limitation, we expand the width of the first layer to  $\Theta^1 \in \mathbb{R}^{J' \times J}$ , and all subsequent layers to  $\Theta^l \in \mathbb{R}^{J' \times J'}$  for  $l \geq 2$ . After the final layer, we project  $y^L$  back to dimension  $J$  using a linear transformation  $W^L \in \mathbb{R}^{J \times J'}$ . By choosing  $J' > J$ , we effectively increase model capacity. We refer to  $J'$  as the model width. In essence, this over-parametrizes lower-order representations to better facilitate the modeling of higher-order effects. We refer the readers to more details about this in Appendix A.2.2.

### B.2 Feature-based Models

**Non-Linear Embedding  $\chi$**  In our implementation, the non-linear embedding function  $\chi$  is defined as a three-layer multilayer perceptron (MLP) with ReLU activations after each hidden layer and a final layer normalization. The network maps the input  $x \in \mathbb{R}^{d_x}$  to an embedding space of dimension  $d$ :

$$\chi(x) = \text{LayerNorm}(W_3 \cdot \text{ReLU}(W_2 \cdot \text{ReLU}(W_1 x + b_1) + b_2) + b_3), \quad x \in \mathbb{R}^{d_x} \quad (15)$$

where  $W_1 \in \mathbb{R}^{d \times d_x}$ ,  $W_2, W_3 \in \mathbb{R}^{d \times d}$ , and  $b_1, b_2, b_3 \in \mathbb{R}^d$ . This embedding function is shared by all items in the choice set.

**Head-specific Nonlinear Transformations  $\phi_h^l$**  We implement the head-specific non-linear transformation  $\phi_h^l$  as a two-layer MLP. The first layer is specific to each head  $h$ , while the second (output) layer is shared across all heads. A LayerNorm is applied after the second layer to stabilize training.

$$\phi_h^l(z_j^0) = \text{LayerNorm}(W_{\text{shared}}^l \cdot \text{ReLU}(W_h^l z_j^0 + b_h^l) + b_{\text{shared}}^l), \quad z_j^0 \in \mathbb{R}^d \quad (16)$$

where  $z_j^0 = \chi(x_j) \in \mathbb{R}^d$ ,  $W_h^l \in \mathbb{R}^{d \times d}$ ,  $W_{\text{shared}}^l \in \mathbb{R}^{d \times d}$ , and  $b_h^l, b_{\text{shared}}^l \in \mathbb{R}^d$ .

**Dummy Items** To enable parallel computation and efficient model training, all choice sets are padded to a uniform size. We pad dummy items using zero vectors in the input space, i.e.,  $\mathbf{0}^{d_x}$ , and explicitly enforce their latent representations to remain inactive throughout the network. Specifically, after each residual layer, we reset  $Z_j^l = \mathbf{0}^d$  for any dummy item  $j$ , ensuring that dummy items do not accumulate or propagate any signal across layers. Since  $\sigma$  is defined as an element-wise polynomial activation function, it satisfies  $\sigma(\mathbf{0}) = \mathbf{0}$ , ensuring that the aggregation process Equation 6 remains unaffected by dummy items. In the final softmax mapping, we set all dummy items’ utility value to be  $-\text{inf}$ . This mechanism guarantees that dummy items do not affect contextual aggregation or final predictions, thereby preserving the integrity of the learned representations.

## C Empirical Study Details

### C.1 Featureless Experiments

#### C.1.1 Synthetic Data Experiments

**Data Generation** In this experiment, we directly sample the choice probability vector uniformly from the 15-dimensional probability simplex  $\mathbb{R}^{15}$ , rather than sampling each individual halo effect from a distribution—such as the standard normal—and then computing the corresponding choice probabilities. While the latter approach may seem more intuitive or realistic, it would require evaluating the choice probabilities exponentially many times due to the complex structure of the choice sets, making it computationally inefficient. Importantly, any choice data can be represented by an appropriate system of halo effects [Batsell and Polking, 1985b], implying that it is not necessary to explicitly specify the underlying halo effects. This justifies the feasibility and practicality of our direct sampling approach.

**Experiments Setup** We conduct two sets of experiments under parameter budgets of 200k and 500k, respectively. For each budget, we vary the model depth from 3 to 7. The batch size and learning rate are fixed to be 1024 and  $1 \times 10^{-4}$ . All models are trained for 500 epochs. The detailed configurations and corresponding training results are summarized below (see Table 3). All experiments, including hypothetical data experiments, are conducted on a single Google Colab T4 GPU with Adam optimizer.

Table 3: Model configurations with depth, width, parameter count, and in-sample training RMSE.

| Group | Depth | Width | Param Count | Training RMSE |
|-------|-------|-------|-------------|---------------|
| 200k  | 3     | 306   | 200.736k    | 0.0434        |
|       | 4     | 251   | 200.298k    | 0.0243        |
|       | 5     | 218   | 200.124k    | 0.0202        |
|       | 6     | 195   | 199.290k    | 0.0188        |
|       | 7     | 179   | 200.838k    | 0.0183        |
| 500k  | 3     | 489   | 499.758k    | 0.0419        |
|       | 4     | 401   | 500.448k    | 0.0156        |
|       | 5     | 348   | 500.424k    | 0.0140        |
|       | 6     | 312   | 501.384k    | 0.0131        |
|       | 7     | 285   | 501.030k    | 0.0130        |

In these experiments, we use the mean squared error (MSE) between the predicted choice probabilities and the ground-truth one-hot choice vectors as the training objective. This allows us to use training RMSE as a proxy for evaluating the model’s approximation error. Note that the training RMSE reported in Table 3 and Figure 2 is not computed directly from the loss. Instead, for each choice set, we first compute the empirical choice frequency vector and then measure the RMSE between this vector and the model’s predicted choice probabilities. A perfect fit would result in an RMSE of zero. This evaluation method highlights the expressiveness of the model, as it directly reflects how well the predicted distributions capture the underlying variability in observed choices, beyond merely fitting to individual samples.

### 982 C.1.2 Real Dataset Experiments

983 **Hotel** From our experimental results, the contextual effects are more pronounced in the second  
 984 hotel, suggesting that user choices in this setting are more strongly influenced by the composition of  
 985 the choice set. As a result, we select the second hotel as a case study to compare our method against  
 986 baseline models, in order to better evaluate their ability to capture such contextual dependencies.

987 **SFOwork and SFOshop** The **SFOwork** dataset includes six transportation modes: driving alone,  
 988 shared ride (2), shared ride (3+), bike, transit, and walk. The **SFOshop** dataset comprises eight  
 989 transportation modes: SharedRide (2+) and DriveAlone, SharedRide (2/3+), DriveAlone, SharedRide  
 990 (3+), walk, transit, SharedRide (2), and bike. These datasets originate from Koppelman and Bhat  
 991 [2006], and we use the preprocessed versions provided by Seshadri et al. [2019].

Table 4: DeepHalo hyper-parameters and training settings for experiments on Hotel, SFOshop, and SFOwork datasets.

| Hyper-parameter                | Hotel              | SFOshop            | SFOwork            |
|--------------------------------|--------------------|--------------------|--------------------|
| Model Width $J'$               | 3                  | 20                 | 20                 |
| Layers $L$                     | 4                  | 5                  | 5                  |
| Polynomial Activation $\sigma$ | Quadratic          | Quadratic          | Quadratic          |
| Batch size                     | Full Batch         | 256                | 256                |
| Learning Rate                  | $1 \times 10^{-3}$ | $1 \times 10^{-4}$ | $1 \times 10^{-4}$ |

992 **Experiments Setup** For the HOTEL dataset, due to its small size and the absence of a dedicated  
 993 validation split, we train the model using a full-batch setting for 300 epochs without early stopping.  
 994 To mitigate overfitting, we adopt a compact model configuration with reduced width and fewer  
 995 parameters. In contrast, for experiments on the SFO datasets (SFOSHOP and SFOWORK), we tune  
 996 the number of layers  $L \in \{4, 5\}$  and the intermediate width  $J' \in \{10, 20\}$  based on validation  
 997 performance. Early stopping is applied with a patience of 10 epochs to prevent overfitting. All  
 998 experiments are conducted on a single Google Colab T4 GPU with Adam optimizer.

999 **Reproducibility Remark** We observe that across all three datasets, the experimental results are  
 1000 highly stable: the standard deviations of both NLL and accuracy over 5 runs are consistently close  
 1001 to zero. Moreover, top-1 accuracy, while intuitive, shows limited sensitivity in reflecting model  
 1002 performance differences due to the relative simplicity of the tasks. Therefore, for brevity and clarity,  
 1003 we omit the full multi-run result tables from the appendix. We have, however, ensured that all reported  
 1004 findings are representative and reproducible.

## 1005 C.2 Feature-based Experiments

### 1006 C.2.1 Datasets Details

1007 **Expedia Dataset** For data preprocessing, we generally follow the procedures outlined in  
 1008 Aouad et al. [2021]. Specifically, we one-hot encode the categorical features `site_id`,  
 1009 `visitor_location_country_id`, `prop_country_id`, and `srch_destination_id`, grouping all  
 1010 categories with fewer than 1,000 occurrences into a special category labeled -1. Continuous features  
 1011 such as `price_usd` and `srch_booking_window` are filtered to remove unrealistic values: we retain  
 1012 only searches with hotel prices between \$10 and \$1,000 and booking windows shorter than one year.  
 1013 A logarithmic transformation is applied to both features to reduce skewness. Missing values across  
 1014 the dataset are imputed using the placeholder value -1.

1015 We further filter out all records where no hotel was chosen, as such cases are not informative for  
 1016 modeling discrete choice and constitute a large portion of the raw data. To handle dummy items  
 1017 introduced for padding, we assign all input features of these items to zero vectors. After preprocessing,  
 1018 we obtain a dataset consisting of 275,609 transaction observations, each described by 35 item-specific  
 1019 features and 56 shared features.

1020 **LPMC Dataset** The LPMC dataset is preprocessed by constructing both item-specific and item-  
 1021 shared features for the four available transportation modes: walk, cycle, public transit, and drive.  
 1022 Each alternative is represented by a 4-dimensional item-specific feature vector that includes duration

(e.g., walking time, cycling time, or transit access/rail/bus/interchange time for public transit), cost (such as fuel prices, transit fare, or congestion charges), number of interchanges (for transit), and a congestion level indicator (for driving).

In addition, we incorporate a set of shared features that are common across all items within a choice set. These include numerical variables such as straight-line distance, user age, gender (binary), driver’s license status (binary), and the number of cars owned. Categorical variables like day of the week and trip purpose are encoded using one-hot representations. After preprocessing, the final dataset includes 8 item-specific features and 17 shared features for each sample.

### C.2.2 Experiments Details

**Experiments Setup** We tune the hyperparameters of DeepHalo based on validation performance. Specifically, we search the number of layers  $L \in \{4, 5\}$ , embedding dimensions  $d \in \{32, 64\}$ , and hidden dimensions  $H \in \{8, 16\}$ . For all configurations, we adopt early stopping with a patience of 10 epochs to prevent overfitting. On the LPMC dataset, we further employ a learning rate scheduling strategy: training is first conducted with a learning rate of  $10^{-3}$ , and then fine-tuned using a smaller rate of  $10^{-4}$ . This two-phase training helps improve convergence stability and final model performance. More details are shown in Table.5. All experiments are conducted on a single Google Colab T4 GPU with Adam optimizer.

Table 5: DeepHalo hyper-parameters and training settings on Expedia and LPMC Experiments.

| Hyper-parameter                | Expedia            | LPMC                                |
|--------------------------------|--------------------|-------------------------------------|
| Embedding dimension $d$        | 32                 | 32                                  |
| Hidden size $H$                | 8                  | 8                                   |
| Layers $L$                     | 5                  | 4                                   |
| Polynomial Activation $\sigma$ | Hadamard product   | Hadamard product                    |
| Batch size                     | 256                | 256                                 |
| Learning Rate                  | $1 \times 10^{-3}$ | $1 \times 10^{-3}/1 \times 10^{-4}$ |

**Baseline Information** We summarize below the key configurations and model architectures for each baseline used in our experiments.

*TCNet* adopts a single-layer Transformer encoder-decoder architecture with multi-head self-attention and feedforward layers. Both the source and target inputs are linear projections of item features. For the LPMC dataset, we use an embedding dimension of  $d = 36$  and  $K = 6$  attention heads; for the Expedia dataset, we set  $d = 64$  and  $K = 8$ . The decoder output for each item is passed through a final linear layer to obtain utility scores.

*RUMnet* models sequential utility construction using a GRU that processes items in their presented order within each choice set. At each timestep, the GRU updates a latent preference state, from which the utility for the current item is computed using a linear transformation. Additionally, an item-specific bias term, learned from raw features, is added to the final score. The hidden size of the GRU is set to 96 for LPMC and 128 for Expedia to accommodate the respective feature complexities.

*TasteNet* implements a latent factor model with learned item and user representations. Both the item encoder and the user encoder are two-layer multilayer perceptrons (MLPs) with a hidden size of 128 and output dimension 128. The user embedding is obtained by averaging valid item feature vectors within a choice set. Final utilities are computed as dot products between item and user embeddings, with an item-specific bias added.

*FATenet* uses a DeepSet architecture where the embedding dimension matches the input size  $d_x$ . Both the embedding network and the pairwise utility network are implemented as five-layer MLPs with 64 hidden units per layer and ReLU activations. The pairwise utility network outputs a scalar utility score for each item-context pair.

*MLP* is a simple three-layer MLP with ReLU activations and a default hidden width of  $d_{\text{embed}} = 128$ . It maps each item feature vector to a scalar utility, followed by a masked softmax normalization over available alternatives. The model does not include any residual connections or context aggregation mechanisms.



1065 *ResLogit* encodes each item through a three-layer MLP with embedding dimension  $d = 32$ , using  
1066 ReLU activations and dropout. The encoded features are passed through a layer normalization layer  
1067 and then linearly projected via a learned coefficient vector  $\beta \in \mathbb{R}^d$ . The resulting utility scores are  
1068 refined through a 10-layer residual network consisting of nonlinear residual blocks based on softplus  
1069 activations, followed by masked softmax.

1070 *DLCL* is a context-aware linear model in which item utilities are computed via a learned matrix  $B$   
1071 modulated by context-dependent adjustments from a second matrix  $A$ , based on the average feature  
1072 vector of the entire choice set. The outputs from different feature dimensions are combined using a  
1073 set of learnable mixture weights to produce the final utility distribution.

1074 **Detailed Results** We run each experiment with different random seeds and report the mean and  
1075 standard deviation of the evaluation metrics from 5 repetitions. This improves statistical robustness  
1076 and accounts for variance due to initialization and stochastic training dynamics. We evaluate model  
1077 performance using negative log-likelihood (NLL) and top-1 accuracy, where accuracy is defined  
1078 as the proportion of cases where the model assigns the highest predicted probability to the actually  
1079 chosen item. Unless otherwise specified, the main results reported in the paper correspond to a single  
1080 representative run. The summary of detailed results is shown in Table 6 and Table 7.

Table 6: Expedia Detailed Results

| Model    | Train                                 |                                       | Validation                            |                                       | Test                                  |                                       |
|----------|---------------------------------------|---------------------------------------|---------------------------------------|---------------------------------------|---------------------------------------|---------------------------------------|
|          | Loss                                  | Acc                                   | Loss                                  | Acc                                   | Loss                                  | Acc                                   |
| DeepHalo | $2.5086 \pm 0.0051$                   | $0.2501 \pm 0.0011$                   | <b><math>2.5216 \pm 0.0025</math></b> | <b><math>0.2474 \pm 0.0007</math></b> | <b><math>2.5288 \pm 0.0026</math></b> | <b><math>0.2442 \pm 0.0009</math></b> |
| TCnet    | <b><math>2.4965 \pm 0.0125</math></b> | <b><math>0.2519 \pm 0.0034</math></b> | $2.5260 \pm 0.0051$                   | $0.2476 \pm 0.0006$                   | $2.5343 \pm 0.0041$                   | $0.2423 \pm 0.0005$                   |
| MLP      | $2.5693 \pm 0.0030$                   | $0.2362 \pm 0.0008$                   | $2.5695 \pm 0.0011$                   | $0.2371 \pm 0.0009$                   | $2.5805 \pm 0.0015$                   | $0.2304 \pm 0.0011$                   |
| FATEnet  | $2.5460 \pm 0.0067$                   | $0.2407 \pm 0.0015$                   | $2.5440 \pm 0.0046$                   | $0.2421 \pm 0.0008$                   | $2.5548 \pm 0.0057$                   | $0.2365 \pm 0.0008$                   |
| ResLogit | $2.5540 \pm 0.0044$                   | $0.2401 \pm 0.0015$                   | $2.5577 \pm 0.0015$                   | $0.2396 \pm 0.0011$                   | $2.5692 \pm 0.0028$                   | $0.2342 \pm 0.0008$                   |
| RUMnet   | $2.5565 \pm 0.0041$                   | $0.2397 \pm 0.0016$                   | $2.5685 \pm 0.0011$                   | $0.2358 \pm 0.0009$                   | $2.5782 \pm 0.0026$                   | $0.2308 \pm 0.0021$                   |
| TasteNet | $2.5623 \pm 0.0081$                   | $0.2383 \pm 0.0016$                   | $2.5675 \pm 0.0036$                   | $0.2374 \pm 0.0007$                   | $2.5766 \pm 0.0040$                   | $0.2326 \pm 0.0008$                   |
| DLCL     | $2.5624 \pm 0.0009$                   | $0.2357 \pm 0.0002$                   | $2.5546 \pm 0.0010$                   | $0.2391 \pm 0.0005$                   | $2.5621 \pm 0.0010$                   | $0.2307 \pm 0.0002$                   |
| MNL      | $2.6272 \pm 0.0001$                   | $0.2260 \pm 0.0002$                   | $2.6160 \pm 0.0001$                   | $0.2275 \pm 0.0002$                   | $2.6245 \pm 0.0001$                   | $0.2210 \pm 0.0003$                   |

Table 7: LPMC Detailed Results

| Model    | Train                                 |                                       | Validation                            |                                       | Test                                  |                                       |
|----------|---------------------------------------|---------------------------------------|---------------------------------------|---------------------------------------|---------------------------------------|---------------------------------------|
|          | Loss                                  | Acc                                   | Loss                                  | Acc                                   | Loss                                  | Acc                                   |
| DeepHalo | <b><math>0.6427 \pm 0.0122</math></b> | <b><math>0.7527 \pm 0.0037</math></b> | <b><math>0.6412 \pm 0.0053</math></b> | <b><math>0.7576 \pm 0.0028</math></b> | <b><math>0.6407 \pm 0.0045</math></b> | <b><math>0.7552 \pm 0.0022</math></b> |
| TCnet    | $0.6744 \pm 0.0098$                   | $0.7422 \pm 0.0036$                   | $0.6581 \pm 0.0096$                   | $0.7500 \pm 0.0038$                   | $0.6577 \pm 0.0076$                   | $0.7468 \pm 0.0023$                   |
| MLP      | $0.7036 \pm 0.0034$                   | $0.7333 \pm 0.0019$                   | $0.6855 \pm 0.0029$                   | $0.7402 \pm 0.0019$                   | $0.6870 \pm 0.0049$                   | $0.7367 \pm 0.0030$                   |
| FATEnet  | $0.6765 \pm 0.0042$                   | $0.7413 \pm 0.0015$                   | $0.6583 \pm 0.0046$                   | $0.7508 \pm 0.0018$                   | $0.6619 \pm 0.0043$                   | $0.7457 \pm 0.0029$                   |
| ResLogit | $0.7080 \pm 0.0047$                   | $0.7293 \pm 0.0025$                   | $0.6926 \pm 0.0057$                   | $0.7348 \pm 0.0022$                   | $0.6915 \pm 0.0052$                   | $0.7370 \pm 0.0017$                   |
| RUMnet   | $0.6923 \pm 0.0074$                   | $0.7378 \pm 0.0017$                   | $0.6754 \pm 0.0079$                   | $0.7460 \pm 0.0025$                   | $0.6779 \pm 0.0067$                   | $0.7411 \pm 0.0020$                   |
| TasteNet | $0.7140 \pm 0.0056$                   | $0.7292 \pm 0.0031$                   | $0.6976 \pm 0.0056$                   | $0.7356 \pm 0.0032$                   | $0.6963 \pm 0.0068$                   | $0.7348 \pm 0.0035$                   |
| DLCL     | $0.7148 \pm 0.0027$                   | $0.7151 \pm 0.0013$                   | $0.6978 \pm 0.0016$                   | $0.7266 \pm 0.0018$                   | $0.6988 \pm 0.0026$                   | $0.7218 \pm 0.0011$                   |
| MNL      | $0.8813 \pm 0.0000$                   | $0.6312 \pm 0.0002$                   | $0.8621 \pm 0.0000$                   | $0.6426 \pm 0.0003$                   | $0.8637 \pm 0.0001$                   | $0.6441 \pm 0.0002$                   |
